1 **Title:**

2 **The Haplotype-resolved Autotetraploid Genome Assembly Provides Insights into**  
3 **the genomic evolution and fruit divergence in Wax apple (*Syzygium***  
4 ***samarangense* (BL.) Merr.et Perry)**

5

6 **Authors:**

7 Xiuqing Wei<sup>1,2†</sup>, Min Chen<sup>3†</sup>, Xijuan Zhang<sup>1</sup>, Yinghao Wang<sup>2</sup>, Liang Li<sup>1</sup>, Ling Xu<sup>1</sup>, Huanhuan  
8 Wang<sup>2</sup>, Mengwei Jiang<sup>2</sup>, Caihui Wang<sup>1</sup>, Lihui Zeng<sup>2\*</sup>, and Jiahui Xu<sup>1\*</sup>.

9

10 **Affiliations:**

11 <sup>1</sup>Fruit Research Institute, Fujian Academy of Agricultural Sciences, Fuzhou 350013, Fujian,  
12 China

13 <sup>2</sup>Fujian Agriculture and Forestry University, Fuzhou 350002, Fujian, China

14 <sup>3</sup>Shenzhen Branch, Guangdong Laboratory for Lingnan Modern Agriculture, Genome  
15 Analysis Laboratory of the Ministry of Agriculture, Agricultural Genomics Institute at  
16 Shenzhen, Chinese Academy of Agricultural Sciences, Shenzhen 518120, China

17 †These authors contributed equally to this article

18

19 **Emails:**

20 Xiuqing Wei, [weixiuqing47@sina.com](mailto:weixiuqing47@sina.com); Min Chen, [15020818115@163.com](mailto:15020818115@163.com); Xijuan  
21 Zhang, [709879201@qq.com](mailto:709879201@qq.com); Yinghao Wang, [Wangyinghao98520@163.com](mailto:Wangyinghao98520@163.com); Liang Li,  
22 [lihaimutang@163.com](mailto:lihaimutang@163.com); Ling Xu, [673440561@qq.com](mailto:673440561@qq.com); Huanhuan Wang,  
23 [whh070506@163.com](mailto:whh070506@163.com); Mengwei Jiang, [mengmengjiang.1105@gmail.com](mailto:mengmengjiang.1105@gmail.com); Caihui Wang,  
24 [wangch0125@163.com](mailto:wangch0125@163.com)

25

26 **\*Corresponding authors:**

27 Jiahui Xu, Tel: +86 591 87570018; Fax: +86 591 87573907; Email: [xjhui577@163.com](mailto:xjhui577@163.com)

28 Lihui Zeng, Emails: [lhzen@fafu.edu.cn](mailto:lhzen@fafu.edu.cn)

29

30 **Keywords:** wax apple (*Syzygium samarangense*), haplotype-resolved autotetraploid genome

31 assembly, transcriptome, fruit size, sugar content, male sterility

32

33

## 34 **Abstract**

35 The wax apple (*Syzygium samarangense*) is an economically important fruit crop with great  
36 potential value to human health because it has rich antioxidant substances. Here, we presented one  
37 haplotype-resolved autotetraploid genome assembly of the wax apple with size of 1.59 Gb.  
38 Comparative genomic analysis revealed three rounds of whole-genome duplication (WGD) events,  
39 including two independent WGDs after WGT- $\gamma$ . Resequencing analysis of 35 accessions  
40 partitioned these individuals into two distinct groups, including 28 landraces and seven cultivated  
41 species, and several selectively swept genes possibly contributed to fruit growth, including *KRPI-*  
42 *like*, *IAA17-like*, *GME-like*, and *FLACCA-like* genes. Transcriptome analysis in three different  
43 varieties during flower and fruit development identified key genes related to fruit size, sugar  
44 content, and male sterility. We found *AP2* also affects the fruit size by regulating the sepal  
45 development in wax apples. The expression of sugar transport-related genes (*SWEETs* and *SUTs*)  
46 was high in 'ZY', likely contributing to a high level of sugar content. Male sterility in 'Tub' was  
47 associated with tapetal abnormalities due to the decreased expression of *DYT1*, *TDF1*, and *AMS*,  
48 which affects the early tapetum development. The chromosome-scale genome and large-scale  
49 transcriptome data presented in this study offer new valuable resources for biological research on  
50 *S. samarangense*, and sheds new light on fruit size control, sugar metabolism, and male sterility  
51 regulatory metabolism in wax apple.

52

## 53 **1. Introduction**

54 Wax apple (*Syzygium samarangense* Bl. Merr. et Perry) also termed Java apple and wax  
55 jambu, is a non-climacteric tropical fruit tree from the *Myrtaceae* family and is native to the  
56 Malay Archipelago<sup>1</sup>. The *Myrtaceae* family is made up of about 80 genera and 3,000 or more  
57 species<sup>2</sup>. According to a few studies of *Myrtaceae* genomes<sup>3,4</sup>, the phylogenetic position remained  
58 uncertain. The *Myrtaceae* family have traditionally been divided into two main groups: fleshy  
59 fruited and dry fruited<sup>2</sup>. As one of the largest genera of fleshy fruited in *Myrtaceae*, the *Syzygium*  
60 species exhibit complex genetic diversity<sup>5</sup>. The *Syzygium* species include *S. aqueum* (water apple,

61  $2n = 44$ ), *S. cumini* (Java plum,  $2n = 66$ ), and *S. samarangense* (wax apple,  $2n = 33, 42, 44, 66$   
62 and 88)<sup>2</sup>. The phylogenetic topologies information based on chloroplast genomes are inconsistent  
63 with geographical and morphological classification to some degree<sup>6</sup>. And few *Syzygium* species  
64 genomes are available to provide a certain genetic relationship. Accordingly, there is necessary to  
65 study the genome information of wax apple to construct a more reliable *Syzygium* species  
66 phylogenetic tree. The acquisition of long contigs from autopolyploid or highly heterozygous  
67 plants is the major obstacle to obtain accurate genome information, which therefore remains a  
68 huge challenge<sup>7,8</sup>.

69 Wax apple fruit is usually eaten fresh, which is bell-shaped and narrow at the base with four  
70 fleshy calyx lobes at the apex. Because of the strong flowering ability, wax apple can fruit in any  
71 given season under proper cultivation measures. The fruit has the characteristics of apple-like  
72 crispness, the aroma of roses, low-acid taste and rich in antioxidant compounds that are beneficial  
73 to human health, and is therefore has become a popular exotic fruit<sup>9,10</sup>. According to statistics from  
74 relevant Chinese authorities, the production of wax apple fruit in Taiwan and Hainan provinces  
75 was 89,800 tons in 2019 and brought great benefit to local farmers and the country's economy  
76 (data from: <http://www.stats.gov.cn/>). In order to meet the needs of consumers and enrich the diet  
77 with high-quality wax apples with a composition that guarantees high nutritional value, it is  
78 important to maintain a suitable sugar content with good size. For some annual crops, *FW* and  
79 *POS* gene were identified to modulate fruit size by regulating cell division or expansion in  
80 tomato<sup>11,12</sup>, and *CsFUL1* was identified to modulate cucumber fruit size elongation through auxin  
81 transportation<sup>13</sup>. However, the genetic information about fruit size regulation in perennial fruit  
82 trees is still unclear. In addition, there is low sugar and sour contents in fruit in the most of wax  
83 apple varieties. The regulatory mechanism of sugar and acid metabolism in wax apple is also  
84 unknown. Therefore, it is need for the genome assembly and whole-genome re-sequencing to  
85 further clarify the regulatory mechanism related to fruit quality in wax apple.

86 It is well known that seedless is an important target trait in fruit breeding. The consumers  
87 prefer the seedless trait of wax apples, which were most selected from bud transformation in wild-  
88 type. It is a great challenge for breeders to breeding new seedless wax apple cultivars by cross-  
89 breeding, and no new cultivars have bred for more than decades. There is still a lack of research  
90 on the genetic regulation mechanism of wax apple. Seedless character caused by male sterility has

91 been developed, such as grape, tomato, and citrus. In plants, the male sterility refers to the  
92 inability to produce the dehiscent anthers, viable male gametes, and functional pollen. Previous  
93 studies have confirmed that the male sterility had two major categories. The male sterility that  
94 resulted from the genes both in mitochondria and nuclear was identified as the cytoplasmic male  
95 sterility (CMS); the male sterility that resulted from the nuclear genes alone was known as the  
96 genetic male sterility (GMS)<sup>14</sup>. For years, wax apple breeding efforts were hampered due to the  
97 complex genetic diversity and the lack of genome information. Therefore, an accurate reference  
98 genome of wax apple is essential for understanding the mechanisms regulating fertility and  
99 accelerating genomic selection breeding efforts.

100 In previous work, a superior clones ‘Tub Ting Jiang’ (‘Tub’) has been selected, with large and  
101 seedless fruit, sweet (total soluble solids ‘TSS’ content is about 10%) and beautiful color<sup>15</sup>. We  
102 also collected two special wax apple varieties, ‘DongKeng’ (‘DK’) and ‘ZiYu’ (‘ZY’). ‘DK’ is a  
103 rootstock variety with rich seeds in all its fruits. And the fruit of ‘ZY’ is bright red, small but high  
104 sweet (TSS is about 14%) with 0 to 2 seeds inside. These varieties will be good materials for  
105 studying the genome information of wax apple. Through the study on wax apple genome, we hope  
106 to accelerate the breeding process and produce more new varieties which are larger, sweeter and  
107 more colorful.

108 In this study, we aim to sequencing and assembly of ‘Tub’, which is an autotetraploid wax  
109 apple variety, to fill wax apple genomic information gaps. This genome was used to conduct a  
110 comparative genomic analysis to further insight into the functional and structural features of the *S.*  
111 *samarangense* genome. Furthermore, we identified the key genes associated with the fruit  
112 size, sugar content and male sterility, which are important breeding traits of wax apple. This  
113 genome will provide a valuable resource for further molecular functional analyses and benefit  
114 to accelerate breeding of wax apple.

115

## 116 **2. Results**

### 117 **2.1 Genome assembly and annotation**

118 To investigate the feature of the *S. samarangense* genome, we first performed the genome  
119 survey analysis, *K*-mer analysis shows multiple peaks at various sequencing coverages, which was  
120 consistent with the distribution characteristics of auto-polyploids (**Supplementary Figure 1**). We

121 further validated that it is an auto-tetraploid genome with 44 chromosomes ( $2n = 4x = 44$ ) based  
122 on 5S rDNA FISH experiment in the karyotype analysis (**Supplementary Figure 2**). The  
123 estimated monoploid genome size of *S. samarangense* was 420 Mb with heterozygosity of 1.16%  
124 based on the *K*-mer analysis. This is consistent with the evaluation by flow cytometry (1.62  
125 Gb/2C), which contains four haplotypes. To generate a haplotype-resolved genome assembly, we  
126 sequenced a total of 92.0 Gb PacBio subreads (~220 x of the estimated monoploid genome size),  
127 90.0 Gb Illumina short reads, and 92.40 Gb high-throughput chromatin conformation capture (Hi-  
128 C) reads (**Supplementary Table 1**). The initial contigs were assembled using the CANU  
129 assembler<sup>16</sup>, resulting in a 1.49-Gb assembly with a contig N50 of 304.5 kb (**Supplementary**  
130 **Table 2**). All contigs were further anchored onto 44 pseudo-chromosomes with 11 homologous  
131 groups by subjecting to ALLHiC phasing, finally, a total of 1.59 Gb phased assembly sequences  
132 were obtained after gap filling, representing an allele-aware, chromosome-scale genome assembly  
133 with completeness of 98.9% evaluated by BUSCO (**Figure 1a, Supplementary Figure 3,**  
134 **Supplementary Table 3**)<sup>17</sup>. In addition, approximately 95.6% of the Illumina clean data can be  
135 aligned onto the genome assembly, covering 97.9% of the genomic regions (**Supplementary**  
136 **Table 4**), suggesting the high-quality genome sequences were acquired.

137 To gain the high-fidelity gene annotation, we used two rounds of MAKER pipeline to  
138 produce a set of 74,888 high-quality protein-coding gene models (**Figure 1b**). BUSCO analysis  
139 showed a completeness of 90.7% with 69.3% duplication (**Supplementary Table 5**), indicated  
140 that the annotation mixed genes and alleles. We adopted our previously developed pipeline in the  
141 sugarcane genome project<sup>18</sup> to separate genes and alleles, resulting in a total of 24,016 genes with  
142 defined alleles. We observed 2,140 (8.9%) genes with four alleles, 7,274 (30.3%) with three, 9,021  
143 (37.6%) with two, and 5,581(23.2%) genes with one. Taken together, our study characterized  
144 52,826 allelic genes, distributed in 24,016 genes with an average of 2.2 alleles per gene. In  
145 addition, we annotated 952 tandemly duplicated genes, and 11,161 dispersedly duplicated paralogs  
146 (**Supplementary Table 6**).

147

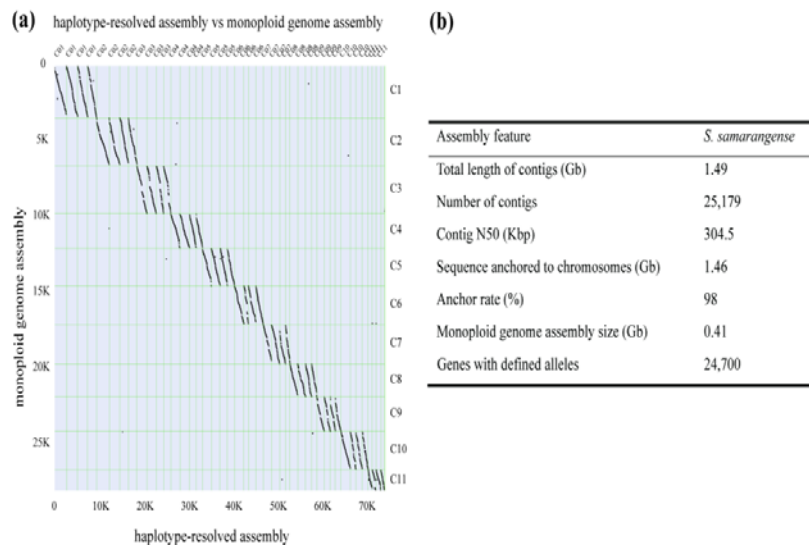

148

149 **Figure 1** Alignment of *S. samarangense* monoploid genome with *S. samarangense* genome and  
150 summary of genome assembly. (a) A set of 4 homologous chromosomes aligned to a single monoploid  
151 chromosome. (b) Statics for genome assembly of wax apple.

152

153 The wax apple genome contains a moderate level of repetitive sequences (593.25 Mb),  
154 accounting for 38.10% of the assembled genome (**Supplementary Table 7**). The long terminal  
155 retrotransposons (LTRs) are the predominant transposable elements (TEs) and account for 24.74%  
156 of the genome, which consist of 5.76% Ty1/*Copia* and 14.72% Ty3/*Gypsy* (**Supplementary**  
157 **Table 7**). The high proportion of LTRs was likely due to a recent large-scale burst that happened  
158 ~0.1 million years ago (Mya) (**Supplementary Figure 4**).

## 159 2.2 Evolutionary history and whole-genome duplication

160 We identified 221 single-copy genes from eight sequenced genomes by OrthoFinder and  
161 subsequently employed them to construct a phylogenetic tree. The results clearly presented that *S.*  
162 *samarangense*, *E. grandis*, and *P. granatum* belong to the same branch of Myrtales. A significant  
163 closer genetic relationship was observed between *S. samarangense* and *E. grandis*, which both  
164 belong to the *Myrtaceae* family. We further estimated the divergence times and found that  
165 Myrtales arose 79.4 million years ago (Mya). Within the *Myrtaceae* family, *S. samarangense* and  
166 *E. grandis* diverged from each other at 26 million years ago (Mya). According to a CAFE analysis,  
167 we characterized 1,328 gene families expanded and 5,363 under contraction (**Figure 2a**). Gene  
168 Ontology (GO) enrichment analysis showed that the 1,328 expanded gene families were majorly  
169 enriched in DNA polymerase activity, retrotransposon nucleocapsid, and mitochondrial fission. In

170 contrast, the 5,363 contracted gene families were majorly enriched in protein serine/threonine  
171 kinase activity, floral organ senescence, and secondary metabolite biosynthetic process  
172 (**Supplementary Figures 5-6**). In comparison with other species, 537 unique gene families were  
173 identified (**Figure 2b**) within the *S. samarangense* genome. These gene families were mainly  
174 enriched in a series of functional items, including catalytic activity, acting on DNA, retrotransfer,  
175 nucleocapsid, transfer, and RNA mediated (**Supplementary Figure 7**).

176 Comparison among the four haplotypes uncovered 4.53 million SNPs, 0.49 million short  
177 indels, and 10,925 structural variations (SVs), and these genetic variations were evenly distributed  
178 along the 44 chromosomes (**Figure 2e and Supplementary Table 8**). The clustering of  
179 chromosome-specific 13-mers partitioned each set of four haplotypes together (**Supplementary**  
180 **Figure 8**), which was inconsistent with the allotetraploid *Miscanthus* genome and showing the  
181 separated distribution of subgenomes. The smudge plot analysis identified that the AAAB pattern  
182 was the dominant component, accounting for 56% of examined *K*-mers (**Supplementary Figure**  
183 **9**). These results collectively support that *S. samarangense* is an auto-tetraploid genome with a  
184 high level of heterozygosity.

185 The distribution of synonymous substitution per synonymous site ( $K_s$ ) of the homologous  
186 gene pairs clearly illustrated that the genome of *S. samarangense* had experienced three different  
187 rounds (WGT- $\gamma$ , WGD-1, and WGD-2) of whole-genome duplication events (**Fig. 2c**). In addition  
188 to, the WGT- $\gamma$  that was commonly found in the evolutionary process of grape and *E. grandis*, we  
189 discovered that *S. samarangense* and *E. grandis* had also undergone an independent whole-  
190 genome duplication (WGD-1). Compared with *E. grandis*, the specific WGD-1 event that  
191 appeared in the genome of *S. samarangense* was more complex. Moreover, the synteny  
192 relationship between the *S. samarangense* and *V. vinifera* was further analyzed to verify that  
193 WGD-1 and WGD-2 occurred after WGT- $\gamma$ . As shown in **Figure 2d**, the collinear relationship  
194 between *S. samarangense* and *V. vinifera* is 8:1, indicated that the occurrence of the two lineage-  
195 specific WGDs in *S. samarangense*.



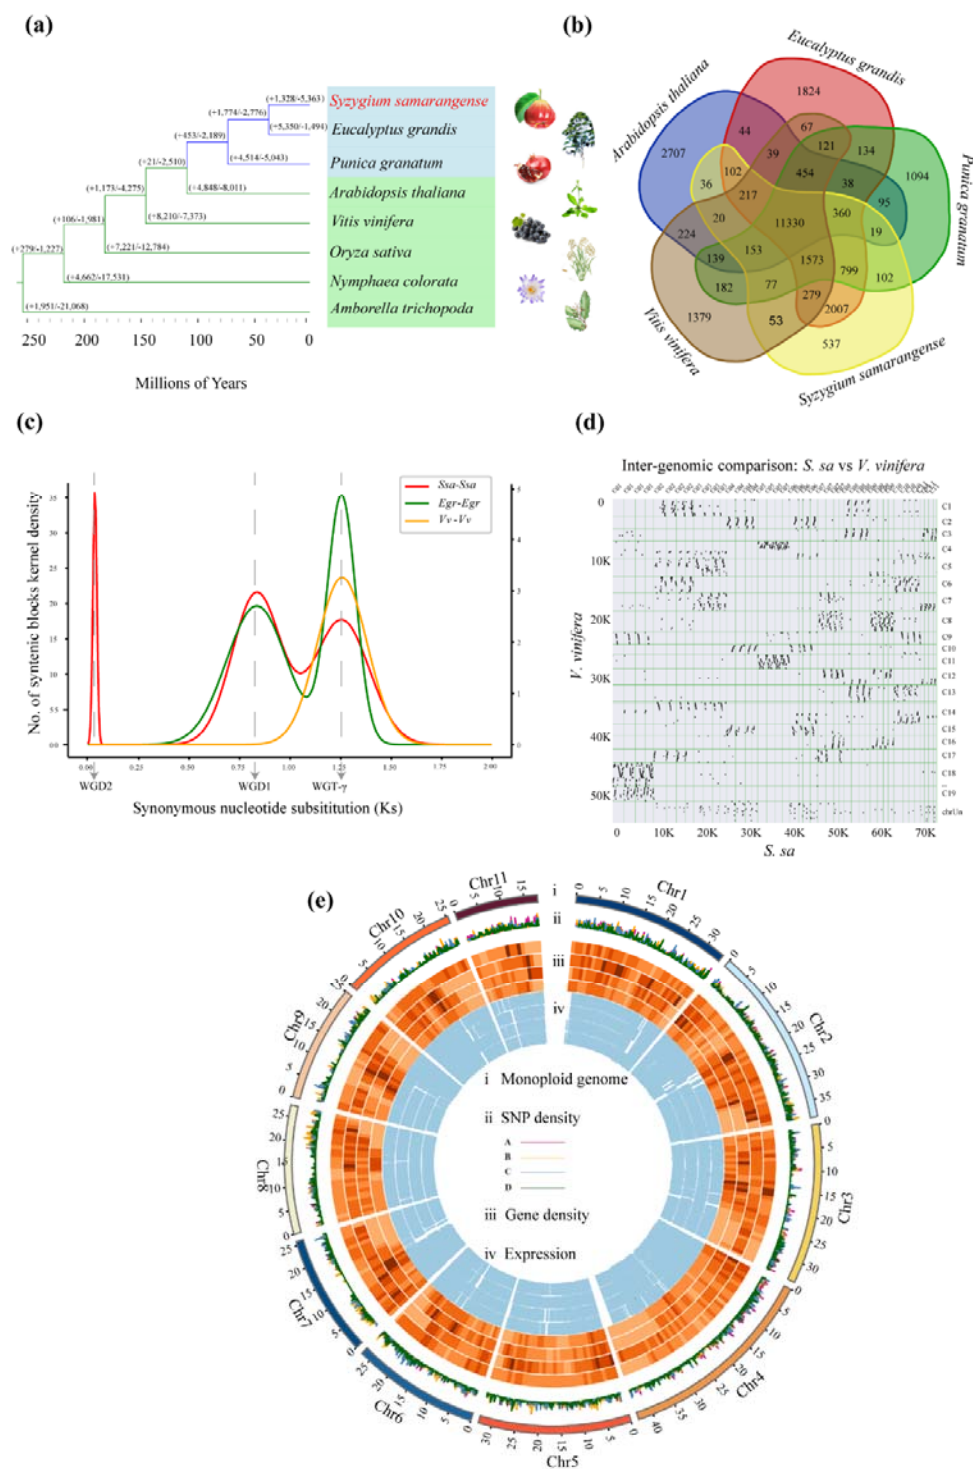

196

197 **Figure 2** Phylogenetic and Comparative Analysis of *S. samarangense*. (a) Phylogenetic tree of *S.*  
 198 *samarangense*, *E. grandis*, *P. granatum*, *A. thaliana*, *V. vinifera*, *O. sativa*, *N. colorata*, and *A.*  
 199 *trichopoda*. Gene family expansion/contraction analysis of the *S. samarangense* genome. The  
 200 divergence times of *S. samarangense* and the other species are labeled in the bottom. (b) Orthologous  
 201 and species-specific gene families in *S. samarangense* and the other species. (c) The distribution of  
 202 synonymous substitution rates (Ks) of the *S. samarangense* paralogs and orthologs with other species.



203 (d) Alignment of *S. samarangense* genome with *Vitis vinifera* genome. (e) From outermost to  
204 innermost layer, these rings indicate monoploid genome in Mbp (a), SNP density among haplotypes  
205 (b), gene density (c) and expression (d), respectively. A, B, C and D respectively represents for four  
206 haplotypes in ring b, and these four haplotypes were ordered from outside to inside in rings c and d.

207

### 208 **2.3 Genetic variations and population structure**

209 We re-sequenced 35 accessions of *S. samarangense* at the whole-genome level and identified  
210 2,891,846 variants, including 2,630,417 SNPs and 261,429 indels (**Supplementary Table 9**). A  
211 total of 67,430 synonymous and 78,424 non-synonymous were identified (**Supplementary Table**  
212 **10**). Phylogenetic analysis demonstrated that these *S. samarangense* were partitioned into two  
213 distinct groups. The commercially cultivated accessions were clustered together as the first group,  
214 and the remaining were landraces with limited artificial selection as the second group (**Figure 3a**,  
215 **Supplementary Table 11**). Both principal component analysis (PCA) and genome structure were  
216 consistent with phylogenetic analysis (**Figure 3b and c**).

217 To identify the candidate genes that might have undergone natural or artificial selection  
218 during the evolutionary history in wax apple, we analyzed selective sweeps based SweeD  
219 analysis<sup>19</sup> in the 35 re-sequenced individuals. A total of 22.0 Mb of genomic sequences, covering  
220 1,299 and 1,109 protein-coding genes, were selectively swept in the landraces and cultivars,  
221 respectively. These selectively swept regions were distributed along the 11 representative  
222 chromosomes that were selected from each set of homologous chromosomes, with some  
223 chromosomes having a higher density (**Supplementary Figure 10-11**). GO enrichment analysis  
224 revealed that these swept genes were significantly enriched in the second-messenger-mediated  
225 signaling and calcium-mediated signaling pathways in landraces. However, these swept genes  
226 were enriched in metabolic process and zygote asymmetric cell division in cultivars  
227 (**Supplementary Figure 12-13**).

228 Phenotypic analysis showed that the cultivated wax apples had increased in fruit weight than  
229 the landraces, leading to a hypothesis that fruit growth-related genes are likely under artificial  
230 selection (**Figure 3d**). To verify this, we collected 30 homologous genes related to fruit growth in  
231 wax apple (**Supplementary table 12**) based on the published genes in tomato<sup>20</sup>. We observed that  
232 the landraces contained three genes located in the selectively swept genomic regions, namely  
233 *KRP1-like*, *IAA17-like*, and *GME-like* which has been demonstrated that involved in cell

234 expansion, including endocycle control, auxin signaling, and ascorbate biosynthesis. In addition,  
235 the *FLACCA-like* gene which involved in ABA biosynthesis was under selection in cultivars<sup>20</sup>  
236 (Supplementary Figure 14-15).  
237

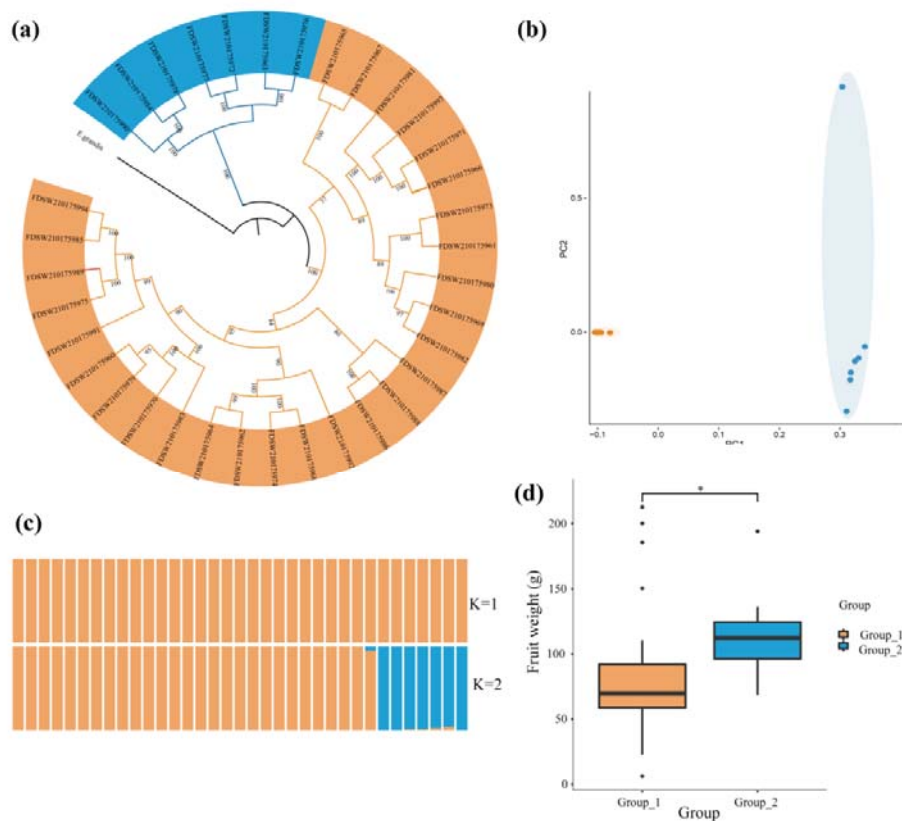

238  
239 **Figure 3** Phylogenetic splits and population genetic structure of 35 *S. samarangense* accessions. (a)  
240 Maximum-likelihood tree of 35 re-sequenced *S. samarangense* individuals constructed based on  
241 2,630,417 SNPs. (b) PCA plots of *S. samarangense* accessions showed two subgroups which indicated  
242 by different colors (blue, cultivars; yellow, landraces). PC, principle component. (c)ADMIXTURE  
243 analysis among the accessions revealed the distribution of K=2 genetic clusters with the smallest  
244 cross-validation error. (d) Comparison of fruit weight between landraces and cultivars.

245

#### 246 **2.4 Genes contributing to fruit size and sugar content**

247 The ‘Tub’ variety had the largest fruit weight, with an average of 124.6 g per single fruit. It is  
248 almost two times than that in ‘ZY’ (68.5 g on average) and four times in ‘DK’ (35.4 g on average).

249 This indicated that the fruit sizes of the three varieties were significantly different. Previous study  
 250 indicated that sepal development gene *APETALA* (*AP*) control the fruit size in apples<sup>21</sup>, which  
 251 have the same fruit structure with wax apple. Through the comparative RNA-Seq data, we found  
 252 that the expression of *AP1* and *AP2* genes were the highest in ‘Tub’ accession that had the largest  
 253 fruit weight, followed by ‘ZY’ and ‘DK’ accessions with much reduced fruit size (**Figure 4**,  
 254 **Supplementary Figure 16-18**). *AP1* gene was highly expressed in ‘Tub’Fr\_T1 and ‘Tub’Fr\_T3  
 255 samples, suggesting that *AP1* may play a role in promoting fruit growth at the early stage of fruit  
 256 development.  
 257

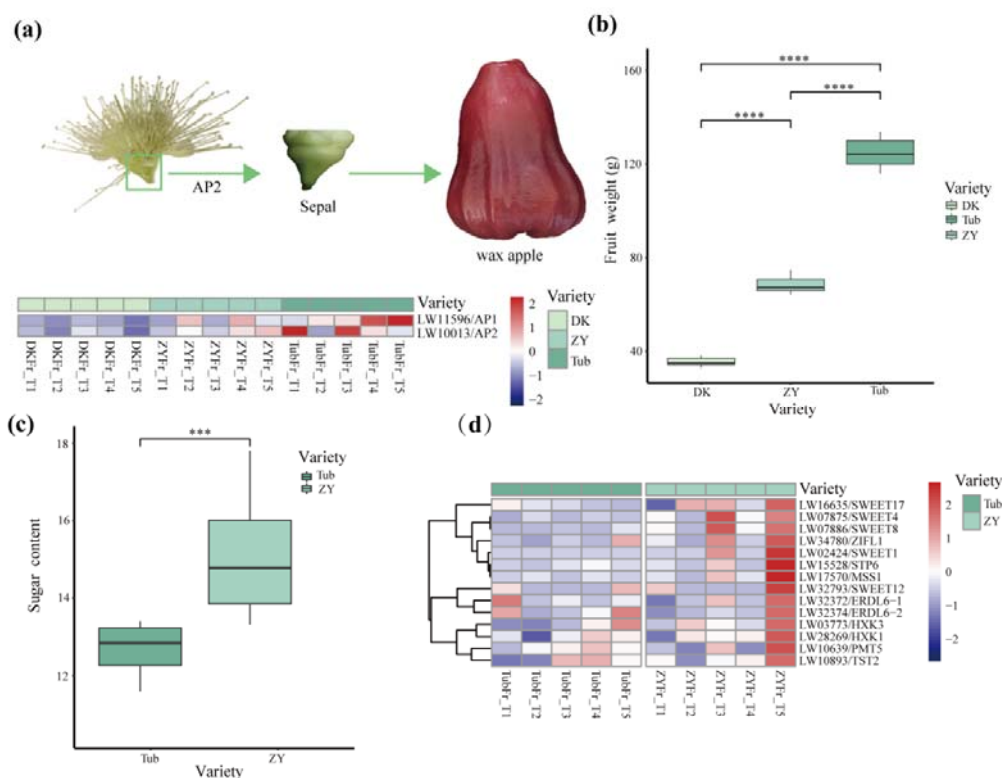

258  
 259 **Figure 4** Genes related to fruit growth and sugar content. (a) The expression of sepal development  
 260 homologies (*AP1* and *AP2*) in 'DK', 'ZY', and 'Tub' during fruit development. (b) Comparison of fruit  
 261 weight among 'DK', 'ZY', and 'Tub'. \*\*\*\*,  $P$  value  $< 0.0001$ , t-test,  $n = 10$ . (c) Comparison of sugar  
 262 content between 'Tub' and 'ZY' fruit at mature. \*\*\*,  $P$  value  $< 0.001$ , t-test. (d) The expression of the  
 263 candidate genes related to sugar transport (*SWEETs*, *ERDLs*, and *TST*) of pink module in 'DK' and 'Tub'  
 264 during fruit development. 'DK': 'Dongkeng'; 'Tub': 'Tub Ting Jiang'. FrT1, FrT2, FrT3, FrT4, and FrT5  
 265 represent 10 to 50 DAFB (days after full bloom) at approximately 10-day intervals.  
 266

267 In fruits, sugar content is usually defined as the total soluble solid content that determines the

268 sweetness and is an important index to determine the fruit quality. We observed that the fruits in  
269 'ZY' contain a significantly higher soluble solid content than those in 'Tub' (14.56% v.s. 11.81%;  
270 **Figure 4c**). We further queried the meaningful genes contributing to the elevated sugar content  
271 through a comparative RNA-seq analysis of fruit samples between 'ZY' and 'Tub'. WGCNA  
272 identified 14 co-expressed modules (**Supplementary Figure 19**), and a total of 400 genes were  
273 co-expressed in 'ZY'Fr\_T5 sample that is the most mature stage of 'ZY' fruit and assumably  
274 contains the highest level of sugar content (**Supplementary Figure 20**). We observed that a list of  
275 important sugar transporter genes exhibited significantly high levels of expression in 'ZY'Fr\_T5  
276 (**Figure 4d**).

## 277 **2.5 Genes associated with male sterility**

278 Seedless fruits are highly desirable due to their commercial values. This trait is likely resulted  
279 from abnormal development of ovule and pollen<sup>22</sup>. The results showed that the anther contains  
280 abundant pollens and normal dehiscence in 'DK', but the anther contains a small amount of pollen  
281 and abnormal dehiscence in 'Tub' (**Figure 5a-b**). Subsequently, we detected the pollen  
282 germination rate in 'DK', 'ZY', and 'Tub'. The results showed that the pollen germination rate  
283 was 11.73% and 45.06% for 'ZY' and 'DK' respectively, but the pollen of 'Tub' wasn't collected  
284 because the anthers abnormal dehiscence (**Figure 5c**).

285 In our study, the samples of different flowering stages were applied for the further RNA-seq  
286 analysis to identify key genes that involved in the development of pollens and anther. The  
287 WGCNA was performed to explore the potential genes that related to the male sterility in 'Tub'.  
288 The coexpression network was constructed based on the correlation of gene expressions in all  
289 samples. Finally, 16 different modules, defined as the highly interconnected gene clusters, were  
290 identified and marked with different colors (**Supplementary Figure 21**). Among these modules,  
291 three potential pollen and anther development-associated module eigengenes were characterized  
292 (**Supplementary Table 13**). In 'DK', the turquoise, tan, and darkgreen modules were correlated  
293 with the development of pollen and anther (**Supplementary Figure 22-24**). Interestingly, the  
294 turquoise module contains the highly connected hub genes, including *LBD10*, *RPG1*, *RBOHE*,  
295 *CALS5*, *SK32*, and *MYB33*, which are known genes involved in the pollen development  
296 (**Supplementary Table 14** and **Supplementary Figure 25**).

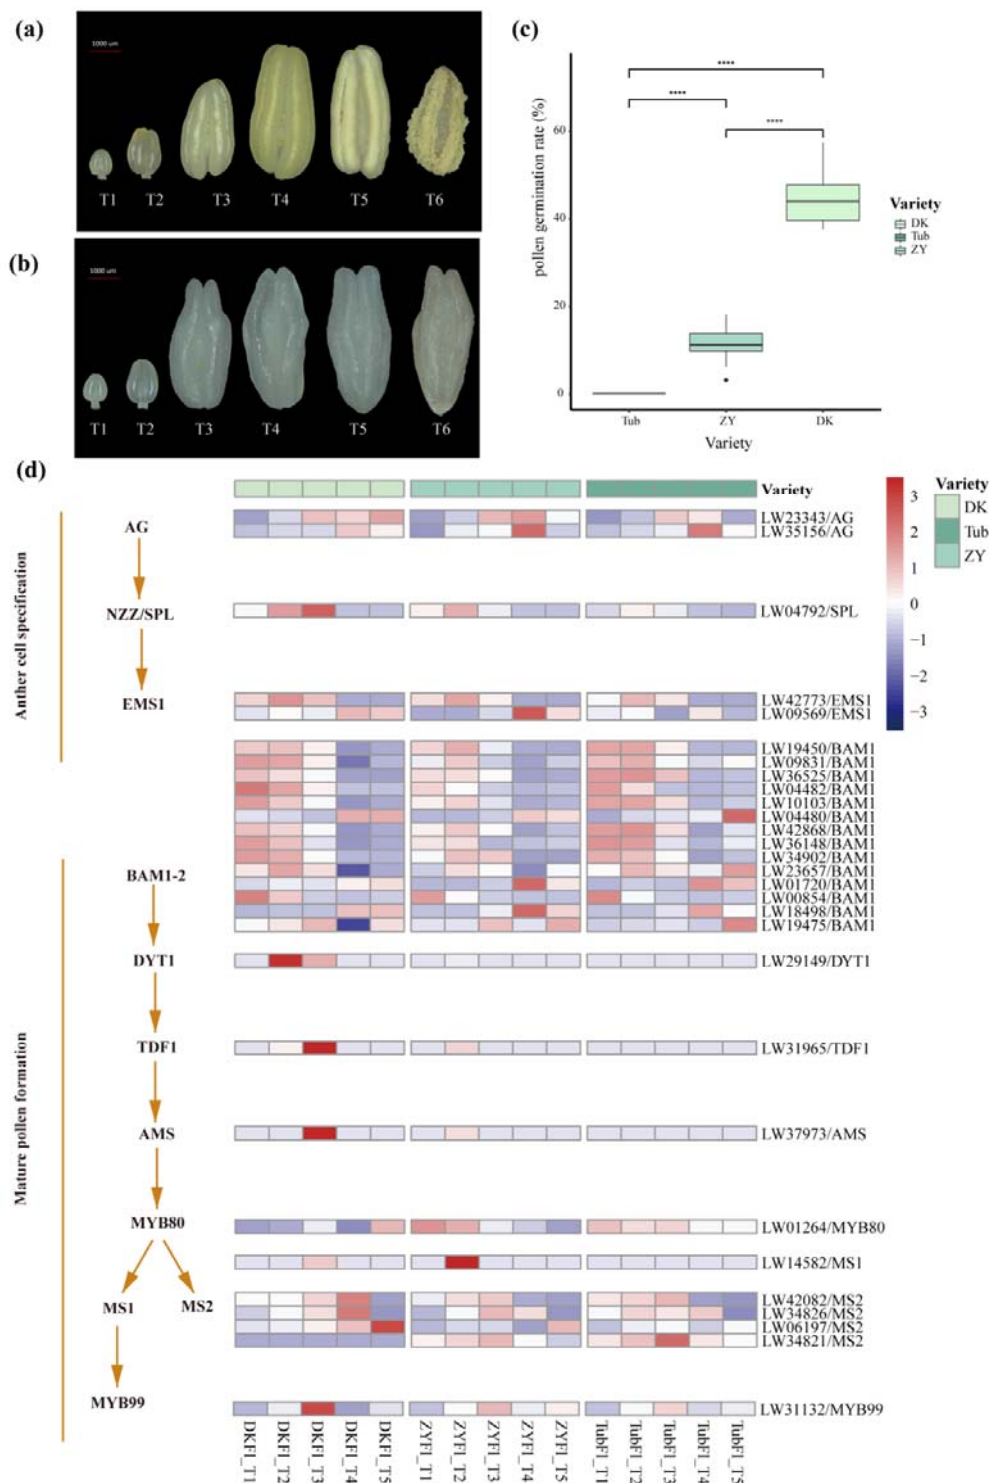

297

298 **Figure 5** Anther development, pollen germination rate, and the expression of anther and pollen  
 299 development related genes in 'DK', 'ZY', and 'Tub'. (a) Anther development and dehiscence in 'DK'. T1-  
 300 T5 is consistent with FIT1-FIT5, and T6 represents 12 hours after blooming. (b) Anther development in  
 301 'Tub'. T1-T5 is consistent with FIT1-FIT5, and T6 represents 12 hours after blooming. (c) Pollen

302 germination rate of 'Tub', 'ZY', and 'DK'. \*\*\*\*,  $P$  value < 0.0001, t-test,  $n = 10$ . (d) Expression (FPKM) of  
303 anther and pollen development related genes in 'DK', 'ZY', and 'Tub' from flower at different stages,  
304 including FIT1, FIT2, FIT3, FIT4, and FIT5. The expression from low to high is indicated by the scale  
305 ranging from blue to red.

306

307 Furthermore, we identified a total of 29 homologous genes that played an important role in  
308 male sterility in *Arabidopsis*. These genes were mainly involved in anther cell specification and  
309 mature pollen formation pathways, and many of them showed differential expression at five  
310 different flower developmental stages (FIT1 to FIT5) among the three examined varieties (**Figure**  
311 **5** and **Supplementary Figure 26**). An anther cell specification related gene nozzle/sporocyteless  
312 (*NZZ/SPL*) was found to be more expressed in 'DK' than in 'Tub'. We also observed that  
313 dysfunctional tapetum 1 (*DYTI*), tapetum development and function 1 (*TDF1*), and abortive  
314 microspore (*AMS*) genes were specifically expressed in FIT2 and FIT3 stages in 'DK', and barely  
315 expressed in 'Tub'. In addition, the expression of three male sterile 2 (*MS2*) homologous genes in  
316 'DK' was much higher than that in 'Tub' at FIT4 and FIT5 stages. The expression pattern of these  
317 pollen development related genes was consistent with the results of pollen germination rate  
318 (**Figure 5d**).

319

### 320 **3. Discussion**

321 The wax apple is an economically important fruit crop and widely cultivated throughout the  
322 southeast Asian countries. Here, we generated a high-quality fully phased auto-tetraploid genome  
323 assembly and 35 re-sequencing accessions. These data represented comprehensive genomic  
324 resources of this species, facilitating to investigate meaningful genetic variations and the  
325 evolutionary history. Comparative genomics and transcriptome analysis also uncovered key genes  
326 underlying fruit growth, fruit size, and sugar content, as well as factors related to male sterility  
327 caused by aborted pollen.

328 The assembly of wax apple is severely hindered by the high level of repetitive sequences and  
329 polyploidy. So far, only a few autotetraploid genomes were assembled to the chromosome level,  
330 including the sugarcane *Saccharum spontaneum*<sup>18</sup>, the cultivated alfalfa<sup>23</sup>, the potato cultivar<sup>24</sup>,  
331 and *Rehmannia glutinosa*<sup>25</sup>. Among these, only the sugarcane and cultivated alfalfa were  
332 assembled by combining the developed sequencing technologies and chromosome phasing

333 algorithm, whereas the developed sequencing technologies and pollen genome were used in the  
334 potato cultivar. Here, we generated a haplotype-resolved chromosome-level genome of *S.*  
335 *samarangense* consisting of 44 allelic chromosomes by combining the sequencing technologies  
336 and chromosome phasing algorithm. The high percentage of assembled genome size to the  
337 monoploid estimation and anchor rate indicated a high-quality, allele-ware, and chromosome-scale  
338 genome assembly, benefiting for the downstream analysis and molecular breeding.

339 Fruit size and sugar content affect consumer preference. Emerging evidence shows that floral  
340 organ development related genes participate in fruit development and play different roles among  
341 species, mainly depending on the type of floral organ that develops into the fruit tissues<sup>26</sup>.  
342 Previous studies have shown that *AP2* governs seed yield<sup>27</sup> and floral development, especially  
343 sepal development<sup>28,29</sup> in *Arabidopsis* and can affect the fruit growth in apples<sup>21</sup>. Intriguingly, *AP2*  
344 inhibits the fruit size in *Arabidopsis*, yet promotes the fruit size in apple<sup>21</sup>. In apple, miR172  
345 inhibits the expression of *AP2*, and overexpression of miR172 reduced fruit size which indicated  
346 miR172 plays a vital role in fruit size via *AP2*<sup>21</sup>. The high expressions of sepal development genes  
347 (*API* and *AP2*) in our results were in the 'Tub' group that had the greatest fruit weight, which  
348 suggests that *API/2* may play an important role in the regulation of wax apple fruit size.  
349 Considering that the wax apple is recognized as the false fruit which develops from the ovary and  
350 sepals, the genes regulating sepal development were likely related to fruit size. *APETALA2* (*AP2*)  
351 governs sepal development, and *APETALA2* (*API*) acts downstream of *AP2*<sup>30</sup>. The main reason for  
352 the phenomenon is that unlike the fruits of apple and *S. samarangense* that grow from the sepals,  
353 the siliques of *Arabidopsis* develop from ovary tissues<sup>31</sup>. In apple, overexpression of *MdERDL6-1*  
354 improved the glucose (Glc), fructose (Fru), and sucrose (Suc) concentration in transgenic apple  
355 fruit and increased the expression of *TST1/TST2* indicating that the sugar content in vacuoles were  
356 mediated by the co-ordinated action of *MdERDL6-1* and *MdTST1/2*<sup>32</sup>. In our study, *ERDL6-1* and  
357 *TST2* were mainly expressed in 'ZY' variety which contains higher sugar content, indicating that  
358 the sugar accumulation in 'ZY' variety is possibly attributed to the higher expression of *ERDL6-1*  
359 and *TST2*. Through a comparative RNA-seq analysis of fruit samples for the meaningful genes  
360 contributing to the elevated sugar content between 'ZY' and 'Tub', we identified 14 co-expressed  
361 modules, and a total of 400 genes were co-expressed in 'ZY'Fr\_T5 sample that is the most mature  
362 stage of 'ZY' fruit and assumably contains the highest level of sugar content, these genes were



363 significantly enriched in a series of molecular functions, particular in sugar transporter activity  
364 items. In addition, the high levels of expression in ‘ZY’Fr\_T5 for list of important sugar  
365 transporter genes including sucrose transporters (*SUTs*), monosaccharide transporters (*MSTs*), and  
366 sugars will eventually be exported transporters (*SWEETs*) and *TMT2*. Our results collectively  
367 supported that these sugar transporter-related genes contributed to elevated sugar content in the  
368 fruit of wax apple.

369 Seedless fruit occupies an important position in the domestic and international market. In  
370 *Arabidopsis* the *LBD10* ortholog can interact with *LBD27* to form a heterodimer and plays an  
371 essential role in the pollen development<sup>33</sup>, highly suggesting its potential role in the regulation of  
372 male sterility in wax apple, and many species have been developed, such as grape and Citrus<sup>34,35</sup>.  
373 Male sterility caused by aborted pollen is the main pathway to cultivate seedless fruit. Based on  
374 these evidences, we speculate that the male sterility in ‘Tub’ is possibly attributed to functional  
375 defects of a couple of key genes, especially *DYT1*, *TDF1*, and *AMS*, affecting the early tapetum  
376 development. In *Arabidopsis*, previous investigations showed that *DYT1*, *TDF1*, *AMS* mutants all  
377 display a fully male sterile phenotype<sup>36-38</sup>. *DYT1-TDF1-AMS-MS188* genetic network was  
378 suppressed in the mutation of *Fatty Acid Export 1* and caused defective pollen formation<sup>39</sup>. Trace  
379 concentrations of imazethapyr (IM) results the gene expression of *DYT1*, *TDF1*, and *AMS*  
380 decreased significantly, which affected anther and pollen biosynthesis in *Arabidopsis*<sup>40</sup>. Here, we  
381 identified that *DYT1*, *TDF1*, and *AMS* were highly expressed in male fertile variety ‘DK’, but  
382 lower in ‘Tub’, and finally in male sterile variety ‘ZY’. Therefore, those genes may play the  
383 potential role in the regulation of fertility in wax apple. Together, male sterility produces seedless  
384 fruit and may be caused by the decreased expression of *DYT1*, *TDF1*, and *AMS*. The results  
385 suggested that these genes could play important roles in the seedless phenotype formation, and the  
386 relative expression level in *LBD10*, *RPG1*, *RBOHE*, *CALS5*, *SK32*, and *MYB33* versus *DYT1*,  
387 *TDF1*, and *AMS* seemed to be key factor in this process in wax apple.

388

#### 389 4. Conclusions

390 Here, a haplotype-resolved autotetraploid genome assembly of the wax apple was generated,  
391 and comparative genomic analysis revealed *S. samarangense* had experienced three different  
392 rounds of WGD events, including two independent WGDs after WGT- $\gamma$ . Transcriptome analysis

393 was used to identify the genes related to fruit size, sugar content, and male sterility. Combined  
394 with fruit weight, fruit development characteristics, and transcriptome data analysis, *API* and *AP2*  
395 genes may regulate fruit size by regulating sepal development. Sugar transport-related genes  
396 (*SWEETs* and *SUTs*) was found to be higher expressed in variety with higher sugar content in ‘ZY’.  
397 The low expression of *DYT1*, *TDF1*, and *AMS* in ‘Tub’ may be the main reason for its sterility.  
398 Our results provide the foundation for further study on the regulatory mechanisms of fruit quality  
399 and male sterility, and can be used in molecular assisted breeding of wax apple, especially for  
400 seedless traits.

401

## 402 **5. Methods**

### 403 **5.1 Illumina short-read sequencing and genome survey**

404 We chose the ‘Tub’ accession for *de novo* genome sequencing and assembly. The plant  
405 materials were maintained by Fujian Academy of Agricultural Sciences, and young leaves were  
406 collected from an individual tree planted in the Field GenBank for wax apple of Fujian Academy  
407 of Agricultural Sciences, Fujian province, China (Coordinates: 26°7'53"N; 119°20'6"E) under the  
408 voucher number GPLWFJGSS0058. Genomic DNA was isolated from young leaves using the  
409 Qiagen Plant Genomic DNA Kit according to the manufacturer’s instructions. Then, the qualified  
410 DNA samples were randomly fragmented with a Covaris S-series Instrument, and Illumina PCR-  
411 free libraries with insert sizes of 350-bp were constructed using Truseq Nano DNA HT Sample  
412 preparation Kit (Illumina USA). Finally, the constructed libraries were sequenced with 150-bp  
413 paired-end sequencing using Illumina HiSeq PE. Using Illumina short reads, the genome size,  
414 repeat contents, and heterozygosity rate of *S. samarangense* were estimated using jellyfish2.2.7  
415 software<sup>41</sup>.

### 416 **5.2 Genome sequencing**

417 A combination of single-molecule real-time sequencing (SMRT), Illumina sequencing, and  
418 Hi-C sequencing with error correction was applied to assemble the complete genome sequence of  
419 *S. samarangense*. For SMRT, genomic DNA was disrupted randomly with 6 kb-20 kb fragments  
420 by g-TUBE (Covaris, Woburn, MA, USA) and sequenced by the PacBio Sequel platform,  
421 generating 110 coverage. For Illumina sequencing, 6 libraries (300 bp) were constructed using  
422 Illumina Truseq Nano DNA Library Prep kit, and the libraries were sequenced on the Illumina Hi-

423 Seq 2000 platform. For Hi-C sequencing, two Hi-C libraries were constructed using a standard  
424 procedure and sequenced using the Illumina Hiseq X Ten sequencer.

### 425 **5.3 Genome assembly**

426 The contig-level assembly of the wax apple genome incorporated Illumina short reads and  
427 PacBio CLR subreads. The PacBio subreads were subject to the whole pipeline of Canu assembler  
428 v1.9<sup>16</sup>, followed by the polishing using the Pilon program<sup>42</sup> to increase assembly accuracy. To  
429 construct the haplotype-resolved genome assembly, we first mapped the Hi-C reads to the polished  
430 contigs assembly using BWA MEM (-5SPM) and extract the uniquely mapped paired reads. The  
431 resulting BAM files were applied on haplotype phasing and scaffolding using ALLHiC pipeline<sup>43</sup>.  
432 In addition, the chimeric scaffolds were manually corrected based on the Hi-C signals in juicebox.  
433 To fill the gaps, first, TGS GapCloser<sup>44</sup> software was used to fill the gaps in the wax apple genome  
434 with 30X ultra-long ONT data. After filling the genome, the number of gaps were significantly  
435 reduced. Then, we used Merqury<sup>45</sup> software to check the gap filled genome, and found that some  
436 errors were introduced compared with the previous filling. To correct these errors, we extracted all  
437 gap sequences filled by TGS GapCloser, and checked the QV quality value of each gap and the  
438 error rate of the corresponding sequence in the genome using the Mercury software. Finally, we  
439 filled the correct GAP into the initial chromosomal level genome. The quality of chromosome-  
440 scale assembly was assessed using Hi-C heatmap.

### 441 **5.4 Genome annotation**

442 To annotate protein-coding genes, we followed the method described in the previous study<sup>46</sup>.  
443 Briefly, we integrated evidences from RNA-seq, orthologous proteins, and ab initio gene  
444 prediction by carrying out two rounds of MAKER pipeline. In the first round of MAKER, Trinity  
445 was used to de novo assembly by using the RNA-seq data<sup>47</sup> and RSEM was applied to calculate  
446 transcript abundance<sup>48</sup>. After filtering the valid transcript, the rest were imported to the PASA  
447 program and the candidate proteins were trained by the ab initio gene prediction<sup>49</sup>. In the second  
448 round of MAKER, the candidate proteins were retrained by ab initio. Hisat2 and StringTie were  
449 used to reassemble<sup>50,51</sup>. Finally, we selected the better annotation of the two rounds annotation.  
450 The BUSCO (v.5) software was applied to calculate the degree of annotation complement. We  
451 used the same method as describing in an autopolyploid sugarcane genome to construct a  
452 monoploid genome, identify alleles, and analyze allelic variations<sup>18</sup>.

## 453 **5.5 RNA library construction and sequencing**

454 To improve the prediction of gene annotation, we performed RNA-seq using different tissues  
455 of *S. samarangense* including flesh, flower, leaf, ovary, root, and stem. All these tissues were  
456 collected and subsequently frozen in liquid nitrogen. Total RNA was extracted with the RNAprep  
457 Pure Plant Plus Kit (TIANGEN) following the manufacturer's procedure. Transcriptome libraries  
458 were constructed using NEBNext® Ultra™ RNA Library Prep Kit for Illumina (NEB, UK)  
459 according to the manufacturer's instructions and sequenced with 150-bp paired-end sequencing  
460 using the Illumina NovaSeq 6000 (Illumina, USA) platform.

## 461 **5.6 Phylogenetic analysis and estimation of the divergence time**

462 To construct the phylogenetic tree, single-copy orthologous genes were defined by  
463 OrthoFinder v2.3.1<sup>52</sup> from protein sequences of seven species (*Eucalyptus grandis*, *Punica*  
464 *granatum*, *Arabidopsis thaliana*, *Vitis vinifera*, *Oryza sativa*, *Nymphaea colorata*, and *Amborella*  
465 *trichopoda*). Afterwards, protein sequences were aligned by MUSCLE<sup>53</sup> and GBLOCKS<sup>54</sup> was  
466 used to trim ambiguous alignment portions. A phylogenetic tree was constructed using RAxML<sup>55</sup>  
467 utilizing the JTT+I+G+F model and 1,000 bootstrap analyses. The divergence time among these  
468 species was estimated by r8s<sup>56</sup>. Whether the gene families had undergone the expansion or  
469 contraction events in the eight sequenced species were identified using CAFE2.2<sup>57</sup>.

## 470 **5.7 Synteny and whole-genome duplication analysis**

471 To investigate the whole genome duplication (WGD) events in *S. samarangense*, synteny  
472 analysis of *S. samarangense* and *V. vinifera* genome was performed. The *V. vinifera* genome and  
473 annotation were downloaded from phytozome (<https://phytozome-next.jgi.doe.gov/>). We applied  
474 the MCScan (python version) pipeline<sup>58</sup> following the suggested best workflow. The syntenic  
475 regions in *S. samarangense* and *V. vinifera* genome supported that *S. samarangense* experienced  
476 two WGD events after WGT- $\gamma$ .

477 To test the reliability of this result, the synonymous nucleotide substitutions on synonymous  
478 sites (Ks) values in *S. samarangense*, *V. vinifera*, and *E. grandis* genomes were estimated by  
479 YN00 program in the WGD package with the Nei-Gojobori approach<sup>59</sup>. For the base substitution  
480 rate is different in the three species, the method applied by Jinpeng Wang<sup>60</sup> was used to correct the  
481 evolutionary rate of duplicated genes. After fit and merge operations, the Ks peaks caused by the  
482 same WGD event could locate in the same place.

## 483 **5.8 Resequencing and population analysis**

484 A total of 35 accessions were re-sequenced, including 28 landraces and seven cultivars. All  
485 accessions were collected from the Field GenBank for wax apple of Fujian Academy of  
486 Agricultural Sciences, Fujian province, China. Young leaves were collected from each accession  
487 and flash frozen in liquid nitrogen for DNA isolation. Genomic DNA from each sample was  
488 isolated, and paired-end reads were sequenced on the Illumina NovaSeq platform. The adaptors  
489 and low-quality were trimmed using Trimmomatic<sup>61</sup>, and clean reads were aligned to the reference  
490 genome of *S. samarangense* using BWA with default parameters<sup>62</sup>. We identified variants  
491 following the GATK<sup>63</sup> best practices pipeline. HaplotypeCaller and GenotypeCaller were used to  
492 call variants from all samples. Maximum-likelihood trees were constructed using VCF2Dis  
493 (<https://github.com/BGI-shenzhen/VCF2Dis>).

494 To infer the subgroup among the re-sequenced *S. samarangense* accessions, admixture<sup>64</sup> was  
495 used with different  $k$  values (from 1 to 3), the optimal value determined in this study was  $k=2$ .  
496 PLINK1.9, and VCFtools<sup>65</sup> were used to perform PCA. Finally, we used SweeD<sup>19</sup> to detect  
497 complete selective sweeps in the *S. samarangense* genome with default settings.

## 498 **5.9 Transcriptome sequencing and identification of co-expression modules**

499 The fruits from three wax apple accessions, 'ZY', 'Tub', and 'DK', were sampled from 10 to  
500 50 DAFB (days after full bloom) at approximately 10-day intervals, representing five  
501 developmental stages, namely T1 to T5. Total RNA was extracted from flower and fruit using  
502 RNAprep Pure Plant Plus Kit (TIANGEN), cDNA libraries were constructed and sequenced by  
503 Illumina NovaSeq 6000 (Illumina, USA) platform. Subsequently, we evaluated reads quality by  
504 FastQC software (<http://www.bioinformatics.babraham.ac.uk/projects/fastqc>), removed  
505 sequencing adapters and low-quality bases using Trimmomatic<sup>61</sup>. The clean data were aligned to  
506 the *S. samarangense* genome using HISAT2 (v2.0.5)<sup>66</sup>, and the fragments per kilobase per million  
507 mapped fragments (FPKM) value was calculated using StringTie (v.1.2.3)<sup>67</sup>. The R package  
508 weighted gene co-expression network analysis (WGCNA) was used to cluster genes with similar  
509 expression based on the FPKM data<sup>68</sup>. Genes with  $|MM|>0.8$  and  $|GS|>0.2$  were selected for  
510 further analysis, and the network was represented and displayed using Cytoscape (v.3.6.0)<sup>69</sup>. Male  
511 sterility and flower development related genes were retrieved from *Arabidopsis*  
512 (<https://www.arabidopsis.org/>), and the homologs of *S. samarangense* were identified by BLASTP

513 search of these sequences against all *S. samarangense* protein sequences.

#### 514 **5.10 Fruit quality analysis and pollen viability determination**

515 For fruit weight analysis, the fruits of all 35 *S. samarangense* materials (including 28  
516 landraces and seven cultivars) were collected. Ten fruits were randomly selected from three trees  
517 for each *S. samarangense* material. The fruit weight was measured by electronic balance  
518 QUINTIX213-1CN (Sartorius, Germany). To determine the total soluble solids (TSS) content,  
519 take 1 cm<sup>3</sup> of tissue from the upper, middle, and lower parts of the each fruit sample, respectively.  
520 Then mixed and homogenized them thoroughly with a mortar and pestle. The supernatant of the  
521 homogenate was used for soluble solids content determinations by a hand-held Brix meter PAL-1  
522 (ATAGO, Japan). To analyze pollen viability, pollen tube germination rate was measured. At 35 °C,  
523 the pollen was cultured for 12 hours in the medium (the concentration of sucrose was 15%, the  
524 concentration of boric acid was 50mg/L, and the concentration of agar was 1%). Then, optical  
525 microscope was used to observe the pollen tube germination. Three fields of vision were randomly  
526 selected, the total number of pollen and the number of germinated pollens were counted at the  
527 same time. The germination rate was calculated. The standard for budding pollen is: the length of  
528 the pollen tube exceeds the diameter of the pollen.

529 For each experiment, the significance of between-group differences was analyzed using t-test.  
530 All statistical analyses were performed using IBM SPSS software. *p*-value < 0.001 was considered  
531 to be statistically significant.

532

#### 533 **Acknowledgements**

534 This work was supported by the Natural Science Foundation of Fujian Province (2020J011361),  
535 the High-quality Development beyond the '5511' Collaborative Innovation Project in Fujian  
536 province (XTCXGC2021016-4). We thank Ping Zhou (Fujian Academy of Agricultural Sciences)  
537 for analysis program in data.

#### 538 **Data availability**

539 Raw sequencing reads used for de novo whole-genome assembly and the final genome have been  
540 deposited in the WGS under access number WGHBKKI00000000. Raw resequencing data were  
541 uploaded to National Genomics Data Center (NGDC, <https://ngdc.cncb.ac.cn/>), submission ID:

542 WGS034963; BioProject access number: PRJCA011822; Biosample access number:  
543 SAMC1129200; GSA access number: CRA010157.

#### 544 **Conflicts of interest**

545 The authors declare no competing interests.

#### 546 **Author contributions**

547 Jiahui Xu and Lihui Zeng designed the experiments; Xiuqing Wei performed the most of the  
548 experiments; Min Chen performed the genome assembly, annotation and the transcriptome data  
549 analysis; Xijuan Zhang and Lin Xu performed phenotype analysis; Liang Li collected the  
550 materials for sequencing; Huanhuan Wang and Caihui Wang analyzed the resequenced data;  
551 Mengwei Jiang conducted comparative genomic analysis. Yinghao Wang filled the gaps of wax  
552 apple genome.

553

#### 554 **References**

- 555 1. Morton, J.F. Java apple in Fruit of Warm Climates (ed Morton, J.F.) 381-382 (Creative  
556 Resources Systems, 1987).
- 557 2. Paull, R.E. & Duarte, O. TROPICAL FRUITS, 2ND EDITION, VOLUME II 2010).
- 558 3. Feng, C. *et al.* A chromosome-level genome assembly provides insights into ascorbic acid  
559 accumulation and fruit softening in guava (*Psidium guajava*). *Plant Biotechnol J* **19**, 717-730  
560 <http://dx.doi.org/10.1111/pbi.13498> (2021).
- 561 4. Luo, X. *et al.* The pomegranate (*Punica granatum* L.) draft genome dissects genetic  
562 divergence between soft- and hard-seeded cultivars. *Plant Biotechnol J* **18**, 955-968  
563 <http://dx.doi.org/10.1111/pbi.13260> (2020).
- 564 5. Vasconcelos, T.N.C. *et al.* Myrteae phylogeny, calibration, biogeography and diversification  
565 patterns: Increased understanding in the most species rich tribe of Myrtaceae. *Mol*  
566 *Phylogenet Evol* **109**, 113-137 <http://dx.doi.org/10.1016/j.ympev.2017.01.002> (2017).
- 567 6. Wei, X. *et al.* Complete chloroplast genome sequence of *Syzygium samarangense* (Myrtaceae)  
568 and phylogenetic analysis. *Mitochondrial DNA B Resour* **7**, 977-979  
569 <http://dx.doi.org/10.1080/23802359.2022.2080022> (2022).
- 570 7. Edger, P.P. *et al.* Origin and evolution of the octoploid strawberry genome. *Nat Genet* **51**, 541-  
571 547 <http://dx.doi.org/10.1038/s41588-019-0356-4> (2019).
- 572 8. Shen, C. *et al.* The Chromosome-Level Genome Sequence of the Autotetraploid Alfalfa and  
573 Resequencing of Core Germplasm Provide Genomic Resources for Alfalfa Research.  
574 *Molecular Plant* **13**, 1250-1261  
575 <http://dx.doi.org/https://doi.org/10.1016/j.molp.2020.07.003> (2020).
- 576 9. Supapvanich, S., Pimsaga, J. & Srisujan, P. Physicochemical changes in fresh-cut wax apple  
577 (*Syzygium samarangense* [Blume] Merrill & L.M. Perry) during storage. *Food Chemistry* **127**,  
578 912-917 <http://dx.doi.org/https://doi.org/10.1016/j.foodchem.2011.01.058> (2011).
- 579 10. FAO. Growing pains for tropical fruit market. Vol. 2022 (ed. FAO) (Food and Agricultural



- 580 Organization of the United Nations, 2005).
- 581 11. Wang, L. *et al.* Regulatory change at *Physalis* Organ Size 1 correlates to natural variation in  
582 tomatillo reproductive organ size. *Nat Commun* **5**, 4271  
583 <http://dx.doi.org/10.1038/ncomms5271> (2014).
- 584 12. Frary, A. *et al.* fw2.2: a quantitative trait locus key to the evolution of tomato fruit size.  
585 *Science* **289**, 85-88 <http://dx.doi.org/10.1126/science.289.5476.85> (2000).
- 586 13. Zhao, J. *et al.* A Functional Allele of CsFUL1 Regulates Fruit Length through Repressing CsSHP  
587 and Inhibiting Auxin Transport in Cucumber. *Plant Cell* **31**, 1289-1307  
588 <http://dx.doi.org/10.1105/tpc.18.00905> (2019).
- 589 14. Chen, L. & Liu, Y.G. Male sterility and fertility restoration in crops. *Annu Rev Plant Biol* **65**,  
590 579-606 <http://dx.doi.org/10.1146/annurev-arplant-050213-040119> (2014).
- 591 15. Xu, J. *et al.* Introduction and supporting cultivation techniques of 'Zihong' wax apple in Fujian.  
592 *China Fruits* 90-93 <http://dx.doi.org/10.16626/j.cnki.issn1000-8047.2016.01.025> (2016).
- 593 16. Koren, S. *et al.* Canu: scalable and accurate long-read assembly via adaptive k-mer weighting  
594 and repeat separation. *Genome Res* **27**, 722-736 <http://dx.doi.org/10.1101/gr.215087.116>  
595 (2017).
- 596 17. Manni, M., Berkeley, M.R., Seppey, M., Simão, F.A. & Zdobnov, E.M. BUSCO Update: Novel  
597 and Streamlined Workflows along with Broader and Deeper Phylogenetic Coverage for  
598 Scoring of Eukaryotic, Prokaryotic, and Viral Genomes. *Mol Biol Evol* **38**, 4647-4654  
599 <http://dx.doi.org/10.1093/molbev/msab199> (2021).
- 600 18. Zhang, J. *et al.* Allele-defined genome of the autopolyploid sugarcane *Saccharum*  
601 *spontaneum* L. *Nat Genet* **50**, 1565-1573 <http://dx.doi.org/10.1038/s41588-018-0237-2>  
602 (2018).
- 603 19. Pavlidis, P., Živkovic, D., Stamatakis, A. & Alachiotis, N. SweeD: likelihood-based detection of  
604 selective sweeps in thousands of genomes. *Mol Biol Evol* **30**, 2224-34  
605 <http://dx.doi.org/10.1093/molbev/mst112> (2013).
- 606 20. Azzi, L. *et al.* Fruit growth-related genes in tomato. *J Exp Bot* **66**, 1075-86  
607 <http://dx.doi.org/10.1093/jxb/eru527> (2015).
- 608 21. Yao, J.L. *et al.* A microRNA allele that emerged prior to apple domestication may underlie fruit  
609 size evolution. *Plant J* **84**, 417-27 <http://dx.doi.org/10.1111/tpi.13021> (2015).
- 610 22. Lora, J., Hormaza, J.I., Herrero, M. & Gasser, C.S. Seedless fruits and the disruption of a  
611 conserved genetic pathway in angiosperm ovule development. *Proc Natl Acad Sci U S A* **108**,  
612 5461-5 <http://dx.doi.org/10.1073/pnas.1014514108> (2011).
- 613 23. Chen, H. *et al.* Allele-aware chromosome-level genome assembly and efficient transgene-free  
614 genome editing for the autotetraploid cultivated alfalfa. *Nat Commun* **11**, 2494  
615 <http://dx.doi.org/10.1038/s41467-020-16338-x> (2020).
- 616 24. Sun, H. *et al.* Chromosome-scale and haplotype-resolved genome assembly of a tetraploid  
617 potato cultivar. *Nat Genet* **54**, 342-348 <http://dx.doi.org/10.1038/s41588-022-01015-0> (2022).
- 618 25. Ma, L. *et al.* De novo genome assembly of the potent medicinal plant *Rehmannia glutinosa*  
619 using nanopore technology. *Comput Struct Biotechnol J* **19**, 3954-3963  
620 <http://dx.doi.org/10.1016/j.csbj.2021.07.006> (2021).
- 621 26. Yao, J.L., Kang, C., Gu, C. & Gleave, A.P. The Roles of Floral Organ Genes in Regulating  
622 Rosaceae Fruit Development. *Front Plant Sci* **12**, 644424  
623 <http://dx.doi.org/10.3389/fpls.2021.644424> (2021).

- 624 27. Jofuku, K.D., Omidyar, P.K., Gee, Z. & Okamoto, J.K. Control of seed mass and seed yield by  
625 the floral homeotic gene APETALA2. *Proc Natl Acad Sci U S A* **102**, 3117-22  
626 <http://dx.doi.org/10.1073/pnas.0409893102> (2005).
- 627 28. Yant, L. *et al.* Orchestration of the floral transition and floral development in Arabidopsis by  
628 the bifunctional transcription factor APETALA2. *Plant Cell* **22**, 2156-70  
629 <http://dx.doi.org/10.1105/tpc.110.075606> (2010).
- 630 29. Thomson, B. & Wellmer, F. Molecular regulation of flower development. *Curr Top Dev Biol*  
631 **131**, 185-210 <http://dx.doi.org/10.1016/bs.ctdb.2018.11.007> (2019).
- 632 30. Weigel, D. & Meyerowitz, E.M. The ABCs of floral homeotic genes. *Cell* **78**, 203-9  
633 [http://dx.doi.org/10.1016/0092-8674\(94\)90291-7](http://dx.doi.org/10.1016/0092-8674(94)90291-7) (1994).
- 634 31. José Ripoll, J. *et al.* microRNA regulation of fruit growth. *Nat Plants* **1**, 15036  
635 <http://dx.doi.org/10.1038/nplants.2015.36> (2015).
- 636 32. Zhu, L. *et al.* MdERDL6-mediated glucose efflux to the cytosol promotes sugar accumulation  
637 in the vacuole through up-regulating TSTs in apple and tomato. *Proc Natl Acad Sci U S A* **118**,  
638 <http://dx.doi.org/10.1073/pnas.2022788118> (2021).
- 639 33. Kim, M.J., Kim, M., Lee, M.R., Park, S.K. & Kim, J. LATERAL ORGAN BOUNDARIES DOMAIN  
640 (LBD)10 interacts with SIDECAR POLLEN/LBD27 to control pollen development in Arabidopsis.  
641 *Plant J* **81**, 794-809 <http://dx.doi.org/10.1111/tpj.12767> (2015).
- 642 34. Ye, W. *et al.* Seedless mechanism of a new mandarin cultivar 'Wuzishatangju' (Citrus  
643 *reticulata* Blanco). *Plant Science* **177**, 19-27  
644 <http://dx.doi.org/https://doi.org/10.1016/j.plantsci.2009.03.005> (2009).
- 645 35. Wang, D. *et al.* Study of free and glycosidically bound volatile compounds in air-dried raisins  
646 from three seedless grape varieties using HS-SPME with GC-MS. *Food Chem* **177**, 346-53  
647 <http://dx.doi.org/10.1016/j.foodchem.2015.01.018> (2015).
- 648 36. Sorensen, A.M. *et al.* The Arabidopsis ABORTED MICROSPORES (AMS) gene encodes a MYC  
649 class transcription factor. *Plant J* **33**, 413-23 <http://dx.doi.org/10.1046/j.1365-313x.2003.01644.x> (2003).
- 651 37. Zhang, W. *et al.* Regulation of Arabidopsis tapetum development and function by  
652 DYSFUNCTIONAL TAPETUM1 (DYT1) encoding a putative bHLH transcription factor.  
653 *Development* **133**, 3085-95 <http://dx.doi.org/10.1242/dev.02463> (2006).
- 654 38. Zhu, J. *et al.* Defective in Tapetal development and function 1 is essential for anther  
655 development and tapetal function for microspore maturation in Arabidopsis. *Plant J* **55**, 266-  
656 77 <http://dx.doi.org/10.1111/j.1365-313X.2008.03500.x> (2008).
- 657 39. Zhu, L., He, S., Liu, Y., Shi, J. & Xu, J. Arabidopsis FAX1 mediated fatty acid export is required  
658 for the transcriptional regulation of anther development and pollen wall formation. *Plant Mol  
659 Biol* **104**, 187-201 <http://dx.doi.org/10.1007/s11103-020-01036-5> (2020).
- 660 40. Qian, H. *et al.* Trace concentrations of imazethapyr (IM) affect floral organs development and  
661 reproduction in Arabidopsis thaliana: IM-induced inhibition of key genes regulating anther  
662 and pollen biosynthesis. *Ecotoxicology* **24**, 163-71 <http://dx.doi.org/10.1007/s10646-014-1369-5> (2015).
- 664 41. Marçais, G. & Kingsford, C. A fast, lock-free approach for efficient parallel counting of  
665 occurrences of k-mers. *Bioinformatics* **27**, 764-70  
666 <http://dx.doi.org/10.1093/bioinformatics/btr011> (2011).
- 667 42. Walker, B.J. *et al.* Pilon: an integrated tool for comprehensive microbial variant detection and

- 668 genome assembly improvement. *PLoS One* **9**, e112963  
669 <http://dx.doi.org/10.1371/journal.pone.0112963> (2014).
- 670 43. Zhang, X., Zhang, S., Zhao, Q., Ming, R. & Tang, H. Assembly of allele-aware, chromosomal-  
671 scale autopolyploid genomes based on Hi-C data. *Nat Plants* **5**, 833-845  
672 <http://dx.doi.org/10.1038/s41477-019-0487-8> (2019).
- 673 44. Xu, M. *et al.* TGS-GapCloser: Fast and accurately passing through the Bermuda in large  
674 genome using error-prone third-generation long reads 2019).
- 675 45. Rhie, A., Walenz, B.P., Koren, S. & Phillippy, A.M. Merqury: reference-free quality,  
676 completeness, and phasing assessment for genome assemblies. *Genome Biol* **21**, 245  
677 <http://dx.doi.org/10.1186/s13059-020-02134-9> (2020).
- 678 46. Zhang, X. *et al.* Haplotype-resolved genome assembly provides insights into evolutionary  
679 history of the tea plant *Camellia sinensis*. *Nat Genet* **53**, 1250-1259  
680 <http://dx.doi.org/10.1038/s41588-021-00895-y> (2021).
- 681 47. Haas, B.J. *et al.* De novo transcript sequence reconstruction from RNA-seq using the Trinity  
682 platform for reference generation and analysis. *Nat Protoc* **8**, 1494-512  
683 <http://dx.doi.org/10.1038/nprot.2013.084> (2013).
- 684 48. Li, B. & Dewey, C.N. RSEM: accurate transcript quantification from RNA-Seq data with or  
685 without a reference genome. *BMC Bioinformatics* **12**, 323 [http://dx.doi.org/10.1186/1471-](http://dx.doi.org/10.1186/1471-2105-12-323)  
686 [2105-12-323](http://dx.doi.org/10.1186/1471-2105-12-323) (2011).
- 687 49. Haas, B.J. *et al.* Improving the Arabidopsis genome annotation using maximal transcript  
688 alignment assemblies. *Nucleic Acids Res* **31**, 5654-66 <http://dx.doi.org/10.1093/nar/gkg770>  
689 (2003).
- 690 50. Kim, D., Langmead, B. & Salzberg, S.L. HISAT: a fast spliced aligner with low memory  
691 requirements. *Nat Methods* **12**, 357-60 <http://dx.doi.org/10.1038/nmeth.3317> (2015).
- 692 51. Pertea, M., Kim, D., Pertea, G.M., Leek, J.T. & Salzberg, S.L. Transcript-level expression analysis  
693 of RNA-seq experiments with HISAT, StringTie and Ballgown. *Nat Protoc* **11**, 1650-67  
694 <http://dx.doi.org/10.1038/nprot.2016.095> (2016).
- 695 52. Emms, D.M. & Kelly, S. OrthoFinder: solving fundamental biases in whole genome  
696 comparisons dramatically improves orthogroup inference accuracy. *Genome Biology* **16**, 157  
697 <http://dx.doi.org/10.1186/s13059-015-0721-2> (2015).
- 698 53. Edgar, R.C. MUSCLE: multiple sequence alignment with high accuracy and high throughput.  
699 *Nucleic Acids Res* **32**, 1792-7 <http://dx.doi.org/10.1093/nar/gkh340> (2004).
- 700 54. Talavera, G. & Castresana, J. Improvement of phylogenies after removing divergent and  
701 ambiguously aligned blocks from protein sequence alignments. *Syst Biol* **56**, 564-77  
702 <http://dx.doi.org/10.1080/10635150701472164> (2007).
- 703 55. Stamatakis, A. RAxML-VI-HPC: maximum likelihood-based phylogenetic analyses with  
704 thousands of taxa and mixed models. *Bioinformatics* **22**, 2688-90  
705 <http://dx.doi.org/10.1093/bioinformatics/btl446> (2006).
- 706 56. Sanderson, M.J. r8s: inferring absolute rates of molecular evolution and divergence times in  
707 the absence of a molecular clock. *Bioinformatics* **19**, 301-2  
708 <http://dx.doi.org/10.1093/bioinformatics/19.2.301> (2003).
- 709 57. De Bie, T., Cristianini, N., Demuth, J.P. & Hahn, M.W. CAFE: a computational tool for the study  
710 of gene family evolution. *Bioinformatics* **22**, 1269-1271  
711 <http://dx.doi.org/10.1093/bioinformatics/btl097> (2006).

- 712 58. Tang, H. *et al.* Synteny and collinearity in plant genomes. *Science* **320**, 486-8  
713 <http://dx.doi.org/10.1126/science.1153917> (2008).
- 714 59. Sun, P. *et al.* WGDl: A user-friendly toolkit for evolutionary analyses of whole-genome  
715 duplications and ancestral karyotypes. (bioRxiv, 2021).
- 716 60. Wang, J. *et al.* Recursive Paleohexaploidization Shaped the Durian Genome. *Plant Physiol* **179**,  
717 209-219 <http://dx.doi.org/10.1104/pp.18.00921> (2019).
- 718 61. Bolger, A.M., Lohse, M. & Usadel, B. Trimmomatic: a flexible trimmer for Illumina sequence  
719 data. *Bioinformatics* **30**, 2114-20 <http://dx.doi.org/10.1093/bioinformatics/btu170> (2014).
- 720 62. Li, H. & Durbin, R. Fast and accurate short read alignment with Burrows-Wheeler transform.  
721 *Bioinformatics* **25**, 1754-60 <http://dx.doi.org/10.1093/bioinformatics/btp324> (2009).
- 722 63. McKenna, A. *et al.* The Genome Analysis Toolkit: a MapReduce framework for analyzing next-  
723 generation DNA sequencing data. *Genome Res* **20**, 1297-303  
724 <http://dx.doi.org/10.1101/gr.107524.110> (2010).
- 725 64. Patterson, N. *et al.* Ancient admixture in human history. *Genetics* **192**, 1065-93  
726 <http://dx.doi.org/10.1534/genetics.112.145037> (2012).
- 727 65. Danecek, P. *et al.* The variant call format and VCFtools. *Bioinformatics* **27**, 2156-8  
728 <http://dx.doi.org/10.1093/bioinformatics/btr330> (2011).
- 729 66. Kim, D., Paggi, J.M., Park, C., Bennett, C. & Salzberg, S.L. Graph-based genome alignment and  
730 genotyping with HISAT2 and HISAT-genotype. *Nat Biotechnol* **37**, 907-915  
731 <http://dx.doi.org/10.1038/s41587-019-0201-4> (2019).
- 732 67. Garber, M., Grabherr, M.G., Guttman, M. & Trapnell, C. Computational methods for  
733 transcriptome annotation and quantification using RNA-seq. *Nat Methods* **8**, 469-77  
734 <http://dx.doi.org/10.1038/nmeth.1613> (2011).
- 735 68. Langfelder, P. & Horvath, S. WGCNA: an R package for weighted correlation network analysis.  
736 *BMC Bioinformatics* **9**, 559 <http://dx.doi.org/10.1186/1471-2105-9-559> (2008).
- 737 69. Shannon, P. *et al.* Cytoscape: a software environment for integrated models of biomolecular  
738 interaction networks. *Genome Res* **13**, 2498-504 <http://dx.doi.org/10.1101/gr.1239303>  
739 (2003).
- 740
